# Supplementary material for: Hospitalization of mild cases of community-acquired pneumonia decreased more than severe ones during the COVID-19 epidemic
Source: bioRxiv or medRxiv preprint supplement (doi:10.1101/2021.03.18.21253861), 2021-03-20
Supplement: Supplementary file [file media-1.pdf]

**Table S1: ICD-10 code into each category.**

| ICD-10 code  | Disease                                                               |
|--------------|-----------------------------------------------------------------------|
| J10.0, J11.0 | Influenza with pneumonia                                              |
| J12.x        | Viral pneumonia                                                       |
| J13          | Pneumococcal pneumonia                                                |
| J14          | Pneumonia due to haemophilus influenzae                               |
| J15.x        | Pneumonia due to other specified bacteria                             |
| J16.x        | Pneumonia due to other infectious pathogens, not elsewhere classified |
| J17.x        | Pneumonia due to diseases classified elsewhere                        |
| J18.x        | Pneumonia, unspecified organism                                       |
| A48.1        | Legionellosis                                                         |
| B01.2        | Varicella pneumonia                                                   |
| B05.2        | Measles, complicated with pneumonia                                   |
| B37.1        | Pulmonary candidiasis                                                 |
| B59          | Pneumocystosis                                                        |
