# Supplementary material for: Hospitalization of mild cases of community-acquired pneumonia decreased more than severe ones during the COVID-19 epidemic
Source: bioRxiv or medRxiv preprint supplement (doi:10.1101/2021.03.18.21253861), 2021-03-20
Supplement: Supplementary file [file media-2.pdf]

**Table S2: The number of cases per month and year-over-year ratio for inpatient cases for CAP, other urgent admission and outpatient cases for CAP.**

| <b>Inpatient cases for CAP</b>  | August | September | October | November | December | January | February | March | April | May   | June  | July  | Total  |
|---------------------------------|--------|-----------|---------|----------|----------|---------|----------|-------|-------|-------|-------|-------|--------|
| 2018/8-2019/7                   | 3002   | 2539      | 2940    | 3027     | 3222     | 4692    | 2972     | 2865  | 3186  | 3517  | 2850  | 3122  | 37934  |
| 2019/8-2020/7                   | 3100   | 2703      | 2758    | 3005     | 3227     | 3915    | 2737     | 2303  | 1738  | 1490  | 1449  | 1541  | 29966  |
| year-over-year ratio            | 1.03   | 1.06      | 0.94    | 0.99     | 1.00     | 0.83    | 0.92     | 0.80  | 0.55  | 0.42  | 0.51  | 0.49  | 0.79   |
| <b>Other urgent admission</b>   | August | September | October | November | December | January | February | March | April | May   | June  | July  | Total  |
| 2018/8-2019/7                   | 63697  | 57370     | 61498   | 59671    | 61665    | 63729   | 54132    | 59124 | 60362 | 61127 | 58062 | 62244 | 722681 |
| 2019/8-2020/7                   | 63875  | 59117     | 61828   | 60393    | 63402    | 62267   | 55593    | 56109 | 50800 | 53361 | 57212 | 58495 | 702452 |
| year-over-year ratio            | 1.00   | 1.03      | 1.01    | 1.01     | 1.03     | 0.98    | 1.03     | 0.95  | 0.84  | 0.87  | 0.99  | 0.94  | 0.97   |
| <b>Outpatient cases for CAP</b> | August | September | October | November | December | January | February | March | April | May   | June  | July  | Total  |
| 2018/8-2019/7                   | 5236   | 4548      | 5357    | 5197     | 5384     | 7000    | 4901     | 5058  | 5706  | 6346  | 5327  | 5642  | 65702  |
| 2019/8-2020/7                   | 5341   | 4951      | 5073    | 5201     | 5647     | 6358    | 5182     | 5486  | 5148  | 3947  | 3757  | 4020  | 60111  |
| year-over-year ratio            | 1.02   | 1.09      | 0.95    | 1.00     | 1.05     | 0.91    | 1.06     | 1.08  | 0.90  | 0.62  | 0.71  | 0.71  | 0.91   |

Other urgent admission: urgent admission for diagnosis other than pneumonia.

CAP: Community acquired pneumonia.
