# Supplementary material for: Hospitalization of mild cases of community-acquired pneumonia decreased more than severe ones during the COVID-19 epidemic
Source: bioRxiv or medRxiv preprint supplement (doi:10.1101/2021.03.18.21253861), 2021-03-20
Supplement: Supplementary file [file media-3.pdf]

**Table S3: The number of cases per month and year-over-year ratio for inpatient cases for CAP according to the A-DROP scoring system.**

| <b>Mild</b>             | August | September | October | November | December | January | February | March | April | May  | June | July | Total |
|-------------------------|--------|-----------|---------|----------|----------|---------|----------|-------|-------|------|------|------|-------|
| 2018/8-2019/7           | 368    | 293       | 395     | 399      | 390      | 471     | 306      | 332   | 421   | 457  | 371  | 370  | 4573  |
| 2019/8-2020/7           | 418    | 323       | 370     | 398      | 428      | 454     | 347      | 254   | 174   | 127  | 142  | 177  | 3612  |
| year-over-year          | 1.14   | 1.10      | 0.94    | 1.00     | 1.10     | 0.96    | 1.13     | 0.77  | 0.41  | 0.28 | 0.38 | 0.48 | 0.79  |
| <b>Moderate</b>         | August | September | October | November | December | January | February | March | April | May  | June | July | Total |
| 2018/8-2019/7           | 1976   | 1699      | 1880    | 1943     | 2010     | 2839    | 1838     | 1827  | 2018  | 2296 | 1833 | 2007 | 24166 |
| 2019/8-2020/7           | 2024   | 1750      | 1734    | 1890     | 2088     | 2393    | 1758     | 1436  | 1084  | 958  | 941  | 988  | 19044 |
| year-over-year          | 1.02   | 1.03      | 0.92    | 0.97     | 1.04     | 0.84    | 0.96     | 0.79  | 0.54  | 0.42 | 0.51 | 0.49 | 0.79  |
| <b>Severe</b>           | August | September | October | November | December | January | February | March | April | May  | June | July | Total |
| 2018/8-2019/7           | 492    | 409       | 522     | 525      | 603      | 987     | 595      | 531   | 556   | 571  | 499  | 580  | 6870  |
| 2019/8-2020/7           | 504    | 474       | 490     | 551      | 515      | 797     | 474      | 457   | 357   | 303  | 264  | 277  | 5463  |
| year-over-year          | 1.02   | 1.16      | 0.94    | 1.05     | 0.85     | 0.81    | 0.80     | 0.86  | 0.64  | 0.53 | 0.53 | 0.48 | 0.80  |
| <b>Extremely severe</b> | August | September | October | November | December | January | February | March | April | May  | June | July | Total |
| 2018/8-2019/7           | 166    | 138       | 143     | 160      | 219      | 395     | 233      | 175   | 191   | 193  | 147  | 165  | 2325  |
| 2019/8-2020/7           | 154    | 156       | 164     | 166      | 196      | 271     | 158      | 156   | 123   | 102  | 102  | 99   | 1847  |
| year-over-year          | 0.93   | 1.13      | 1.15    | 1.04     | 0.89     | 0.69    | 0.68     | 0.89  | 0.64  | 0.53 | 0.69 | 0.60 | 0.79  |

CAP: Community acquired pneumonia.
