# Supplementary material for: Hospitalization of mild cases of community-acquired pneumonia decreased more than severe ones during the COVID-19 epidemic
Source: bioRxiv or medRxiv preprint supplement (doi:10.1101/2021.03.18.21253861), 2021-03-20
Supplement: Supplementary file [file media-4.pdf]

**Table S4: Interrupted time series analysis for in patient cases and outpatient cases for CAP.**

|                          | Time point    | Estimate | Lower 95%CI | Upper 95% CI |
|--------------------------|---------------|----------|-------------|--------------|
| Inpatient case for CAP   | February 2020 | -1337    | -1991       | -684         |
|                          | March 2020    | -1233    | -1955       | -521         |
|                          | April 2020    | -1309    | -2047       | -571         |
| Outpatient cases for CAP | February 2020 | -1827    | -2951       | -703         |
|                          | March 2020    | -1808    | -2960       | -656         |
|                          | April 2020    | -2292    | -3329       | -1256        |

CAP: Community acquired pneumonia.

Estimate: estimated decrease in the number of cases in the interrupted time series analysis.
